# Supplementary material for: Decoding the Effect of Age on the Taste Perception of Chicken Breast Soup Based on LC-QTOF-MS/MS Combined with a Chemometric Approach
Source: MDPI journal article supplement (doi:10.3390/foods12030674), 2023-02-03
Supplement: s1 [file s1]

**Table S1.** Basic ingredients of four chicken breast samples.

| Sample               | Basic components (%) |     |               |           |         |
|----------------------|----------------------|-----|---------------|-----------|---------|
|                      | Moisture             | Ash | Crude protein | Crude fat | Glucose |
| 10 wk chicken breast | 75.6                 | 1.0 | 23.0          | 0.8       | 0.5     |
| 20 wk chicken breast | 74.2                 | 1.1 | 23.8          | 1.4       | 0.5     |
| 60 wk chicken breast | 72.5                 | 1.0 | 24.7          | 1.7       | 0.31    |
| 90 wk chicken breast | 72.8                 | 1.4 | 24.6          | 2.9       | 0.5     |

**Table S2.** Chemicals information.

| Chemicals                | Purity | Manufacturers               |
|--------------------------|--------|-----------------------------|
| Formic acid              | 98%    | Bailingwei (Beijing, China) |
| Malic acid               | 99%    | Bailingwei (Beijing, China) |
| Adenosine 5'-diphosphate | 98%    | Bailingwei (Beijing, China) |
| Nicotinic acid           | 99.5%  | Bailingwei (Beijing, China) |
| Choline hydroxide        | 47.3%  | Bailingwei (Beijing, China) |
| Inosine                  | 98%    | Aladdin (Shanghai, China)   |
| Carnosine                | 97%    | Aladdin (Shanghai, China)   |
| Isoleucine               | 99%    | Aladdin (Shanghai, China)   |
| Creatinine               | 99%    | Aladdin (Shanghai, China)   |
| Proline                  | 99%    | Aladdin (Shanghai, China)   |
| Aspartic acid            | 99%    | Aladdin (Shanghai, China)   |
| Glutamic acid            | 99%    | Aladdin (Shanghai, China)   |
| Histidine                | 99%    | Aladdin (Shanghai, China)   |
| Phenylalanine            | 99%    | Aladdin (Shanghai, China)   |
| Tyrosine                 | 99%    | Aladdin (Shanghai, China)   |
| Methionine               | 99%    | Aladdin (Shanghai, China)   |
| 3-Methyl-L-histidine     | 98%    | Aladdin (Shanghai, China)   |
| Arginine                 | 98%    | Aladdin (Shanghai, China)   |
| Valine                   | 99%    | Aladdin (Shanghai, China)   |
| Alanine                  | 99%    | Aladdin (Shanghai, China)   |
| 4-Aminobutyric acid      | 99%    | Aladdin (Shanghai, China)   |
| Guanosine                | 98%    | Aladdin (Shanghai, China)   |
| Glutathione              | 99%    | Aladdin (Shanghai, China)   |
| 4-Hydroxybenzaldehyde    | 99%    | Aladdin (Shanghai, China)   |
| Leucine                  | 99%    | Aladdin (Shanghai, China)   |
| Nicotinamide             | 99.5%  | Aladdin (Shanghai, China)   |
| Theanine                 | 99%    | Aladdin (Shanghai, China)   |
| Tryptophan               | 99%    | Aladdin (Shanghai, China)   |
| Hypoxanthine             | 99%    | Macklin (Shanghai, China)   |
| Guanine                  | 99%    | Macklin (Shanghai, China)   |
| Anserine                 | 97%    | Macklin (Shanghai, China)   |
| Adenine                  | 99.5%  | Macklin (Shanghai, China)   |
| Pyroglutamic acid        | 99%    | Macklin (Shanghai, China)   |

**Table S2. Continued.**

| Chemicals                           | Purity | Manufacturers                           |
|-------------------------------------|--------|-----------------------------------------|
| Adenosine                           | 99.5%  | Macklin (Shanghai, China)               |
| Lactic acid                         | 98%    | Jinming Bio-Technology (Beijing, China) |
| Inosine 5'-monophosphate            | 98%    | Sigma-Aldrich (Shanghai, China)         |
| Adenosine 5'-monophosphate          | 97%    | Sigma-Aldrich (Shanghai, China)         |
| Disodium 5'-Guanylate               | 99%    | Sigma-Aldrich (Shanghai, China)         |
| Taurine                             | 99%    | Sigma-Aldrich (Shanghai, China)         |
| 5-(2-Hydroxyethyl)-4-methylthiazole | 98%    | Sigma-Aldrich (Shanghai, China)         |
| Ethyl cinnamate                     | 98%    | Sigma-Aldrich (Shanghai, China)         |
| Palmitic acid                       | 99%    | Sigma-Aldrich (Shanghai, China)         |
| Propionic acid                      | 99%    | TCI (Shanghai, China)                   |
| Tartaric acid                       | 99%    | Sinopharm (Shanghai, China)             |
| Succinic acid                       | 99.5%  | Sinopharm (Shanghai, China)             |
| Fumaric acid                        | 99%    | Sinopharm (Shanghai, China)             |
| Citric acid                         | 99.8%  | Sinopharm (Shanghai, China)             |
| Betaine                             | 99%    | Yuanye Bio-Technology (Shanghai, China) |
| Cinnamic acid                       | 99.5%  | Yuanye Bio-Technology (Shanghai, China) |
| 2,6-Dihydroxypurine                 | 98%    | Yuanye Bio-Technology (Shanghai, China) |
| Uric acid                           | 99%    | Yuanye Bio-Technology (Shanghai, China) |
| Kojic acid                          | 99%    | Yuanye Bio-Technology (Shanghai, China) |
| Carnitine                           | 98%    | Yuanye Bio-Technology (Shanghai, China) |
| Uridine                             | 99%    | Yuanye Bio-Technology (Shanghai, China) |
| Riboflavin                          | 98%    | Yuanye Bio-Technology (Shanghai, China) |
| Cholic acid                         | 97%    | Yuanye Bio-Technology (Shanghai, China) |
| Furaneol                            | 98%    | Yuanye Bio-Technology (Shanghai, China) |
| Linolenic acid                      | 98%    | Yuanye Bio-Technology (Shanghai, China) |
| Linoleic acid                       | 98%    | Yuanye Bio-Technology (Shanghai, China) |

**Table S3.** Instrument conditions for LC-QTOF-MS/MS analysis.

| <b>Gradient elution procedure</b>   |                       |                                     |
|-------------------------------------|-----------------------|-------------------------------------|
|                                     | Time (min)            | Proportion of mobile phase A(C) (%) |
|                                     | 0                     | 95                                  |
|                                     | 33                    | 82                                  |
|                                     | 46                    | 65                                  |
|                                     | 49                    | 20                                  |
|                                     | 53                    | 20                                  |
|                                     | 54                    | 5                                   |
|                                     | 60                    | 95                                  |
| <b>Mass spectrum parameters</b>     |                       |                                     |
|                                     | ESI <sup>+</sup> mode | ESI <sup>-</sup> mode               |
| Scan range for MS and MS/MS         | 50~1000 Da            | 50~1000 Da                          |
| Capillary voltage                   | +5500 V               | -4500 V                             |
| Gas 1                               | 55 psi                | 55 psi                              |
| Gas 2                               | 60 psi                | 60 psi                              |
| Curtain gas                         | 35 psi                | 35 psi                              |
| Electrospray ion source temperature | 550 °C                | 550 °C                              |
| Declustering potential              | +80V                  | -80V                                |
| Collision energy                    | +35±15V               | -35±15V                             |

**Table S4.** Kruskal–Wallis test results for taste profiles of four chicken soup samples.

|               | 10 wk             | 20 wk             | 60 wk             | 90 wk             | <i>p</i> <sup>a</sup> |
|---------------|-------------------|-------------------|-------------------|-------------------|-----------------------|
| Sourness      | 2.00 (1.00, 2.25) | 2.00 (1.75, 3.25) | 3.00 (2.75, 3.25) | 4.00 (2.75, 4.00) | 0.003**               |
| Sweetness     | 2.00 (1.00, 2.25) | 2.00 (1.00, 2.25) | 1.00 (1.00, 1.25) | 1.00 (1.00, 2.25) | 0.212                 |
| Bitterness    | 1.00 (1.00, 1.25) | 2.00 (1.00, 2.00) | 1.00 (1.00, 1.25) | 2.00 (1.00, 2.00) | 0.090                 |
| Saltiness     | 2.00 (2.00, 2.00) | 3.00 (2.00, 3.25) | 3.00 (2.75, 4.25) | 4.00 (3.00, 4.50) | <0.001**              |
| Umami         | 6.00 (4.75, 6.00) | 5.00 (4.00, 7.00) | 7.00 (5.25, 7.00) | 8.00 (8.00, 8.00) | <0.001**              |
| Overall taste | 5.00 (4.00, 5.00) | 5.00 (4.75, 7.00) | 5.00 (4.00, 6.00) | 6.00 (5.00, 6.25) | 0.031*                |

The results are reported as median (25th percentile (P25), 75th percentile (P75)). <sup>a</sup> Kruskal–Wallis test was used to compare variables between the groups. \*\**p*<0.01, \**p*<0.05.

**Table S5.** Compounds identified in four soup samples.

| No. | Compound                            | Molecular weight | Mode             | No. | Compound            | Molecular weight | Mode             |
|-----|-------------------------------------|------------------|------------------|-----|---------------------|------------------|------------------|
| P01 | Adenosine                           | 267.24           | ESI <sup>+</sup> | N09 | Aspartic acid       | 133.1            | ESI <sup>-</sup> |
| P02 | Creatinine                          | 113.12           | ESI <sup>+</sup> | N10 | Malic acid          | 134.09           | ESI <sup>-</sup> |
| P03 | Proline                             | 115.13           | ESI <sup>+</sup> | N11 | Glutamic acid       | 147.13           | ESI <sup>-</sup> |
| P04 | Betaine                             | 117.15           | ESI <sup>+</sup> | N12 | Cinnamic acid       | 148.16           | ESI <sup>-</sup> |
| P05 | 5'-GMP                              | 387.22           | ESI <sup>+</sup> | N13 | 2,6-Dihydroxypurine | 152.11           | ESI <sup>-</sup> |
| P06 | Choline                             | 121.18           | ESI <sup>+</sup> | N14 | Histidine           | 155.15           | ESI <sup>-</sup> |
| P07 | Nicotinamide                        | 122.12           | ESI <sup>+</sup> | N15 | Phenprobamate       | 165.19           | ESI <sup>-</sup> |
| P08 | Nicotinic acid                      | 123.11           | ESI <sup>+</sup> | N16 | Uric acid           | 168.11           | ESI <sup>-</sup> |
| P09 | Furaneol                            | 128.13           | ESI <sup>+</sup> | N17 | Theanine            | 174.2            | ESI <sup>-</sup> |
| P10 | Isoleucine                          | 131.17           | ESI <sup>+</sup> | N18 | Tyrosine            | 181.19           | ESI <sup>-</sup> |
| P11 | Hypoxanthine                        | 136.11           | ESI <sup>+</sup> | N19 | Citric acid         | 192.12           | ESI <sup>-</sup> |
| P12 | Kojic acid                          | 142.11           | ESI <sup>+</sup> | N20 | Tryptophan          | 204.23           | ESI <sup>-</sup> |
| P13 | 5-(2-Hydroxyethyl)-4-methylthiazole | 143.21           | ESI <sup>+</sup> | N21 | Propionic acid      | 74.08            | ESI <sup>-</sup> |
| P14 | Ala-Phe                             | 236.27           | ESI <sup>+</sup> | N22 | Carnosine           | 226.23           | ESI <sup>-</sup> |
| P15 | Methionine                          | 149.21           | ESI <sup>+</sup> | N23 | Adenine             | 135.13           | ESI <sup>-</sup> |
| P16 | Guanine                             | 151.13           | ESI <sup>+</sup> | N24 | Anserine            | 240.26           | ESI <sup>-</sup> |
| P17 | Carnitine                           | 161.2            | ESI <sup>+</sup> | N25 | Uridine             | 244.2            | ESI <sup>-</sup> |
| P18 | Ethyl cinnamate                     | 162.19           | ESI <sup>+</sup> | N26 | Palmitic acid       | 256.42           | ESI <sup>-</sup> |
| P19 | 3-Mehtyl-L-Histidine                | 169.18           | ESI <sup>+</sup> | N27 | Tartaric acid       | 150.09           | ESI <sup>-</sup> |
| P20 | Arginine                            | 174.2            | ESI <sup>+</sup> | N28 | Inosine             | 268.23           | ESI <sup>-</sup> |
| P21 | Riboflavin                          | 376.36           | ESI <sup>+</sup> | N29 | Linolenic acid      | 278.43           | ESI <sup>-</sup> |
| P22 | Adenosine 5'-diphosphate            | 427.2            | ESI <sup>+</sup> | N30 | Linoleic acid       | 280.45           | ESI <sup>-</sup> |
| N01 | Lactic acid                         | 90.08            | ESI <sup>-</sup> | N31 | Valine              | 117.15           | ESI <sup>-</sup> |
| N02 | 4-Aminobutyric acid                 | 103.12           | ESI <sup>-</sup> | N32 | Alanine             | 89.09            | ESI <sup>-</sup> |
| N03 | Fumaric acid                        | 116.07           | ESI <sup>-</sup> | N33 | Guanosine           | 283.24           | ESI <sup>-</sup> |
| N04 | Succinic acid                       | 118.09           | ESI <sup>-</sup> | N34 | 5'-AMP              | 347.22           | ESI <sup>-</sup> |
| N05 | 4-Hydroxybenzaldehyde               | 122.12           | ESI <sup>-</sup> | N35 | 5'-IMP              | 348.21           | ESI <sup>-</sup> |
| N06 | Taurine                             | 125.15           | ESI <sup>-</sup> | N36 | Cholic acid         | 408.58           | ESI <sup>-</sup> |
| N07 | Pyroglutamic acid                   | 129.11           | ESI <sup>-</sup> | N37 | Glutathione         | 612.63           | ESI <sup>-</sup> |
| N08 | Leucine                             | 131.17           | ESI <sup>-</sup> |     |                     |                  |                  |

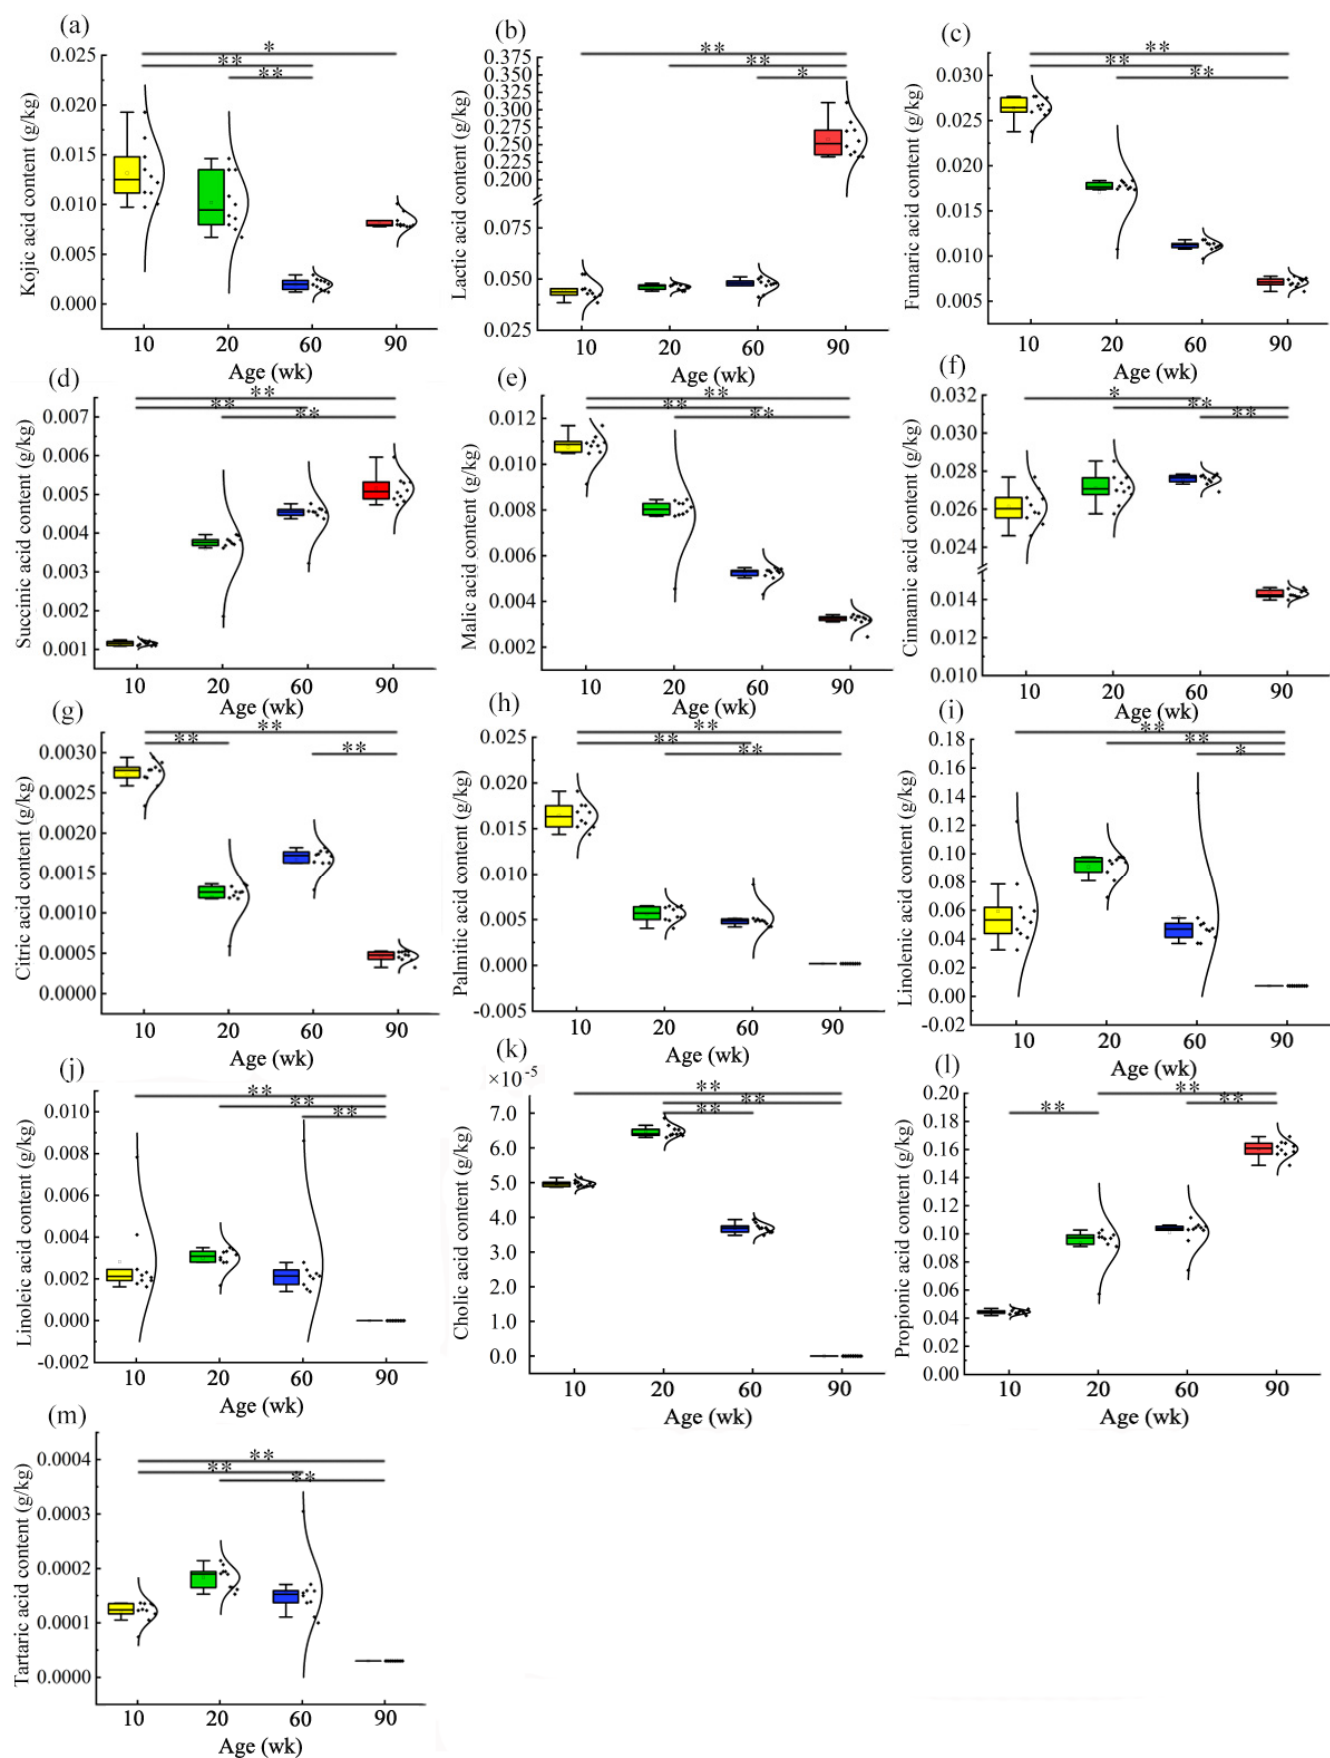

**Figure S1.** The distribution of organic acids (a-m) in four soup samples (\*\* $p < 0.01$ , \* $p < 0.05$ ).

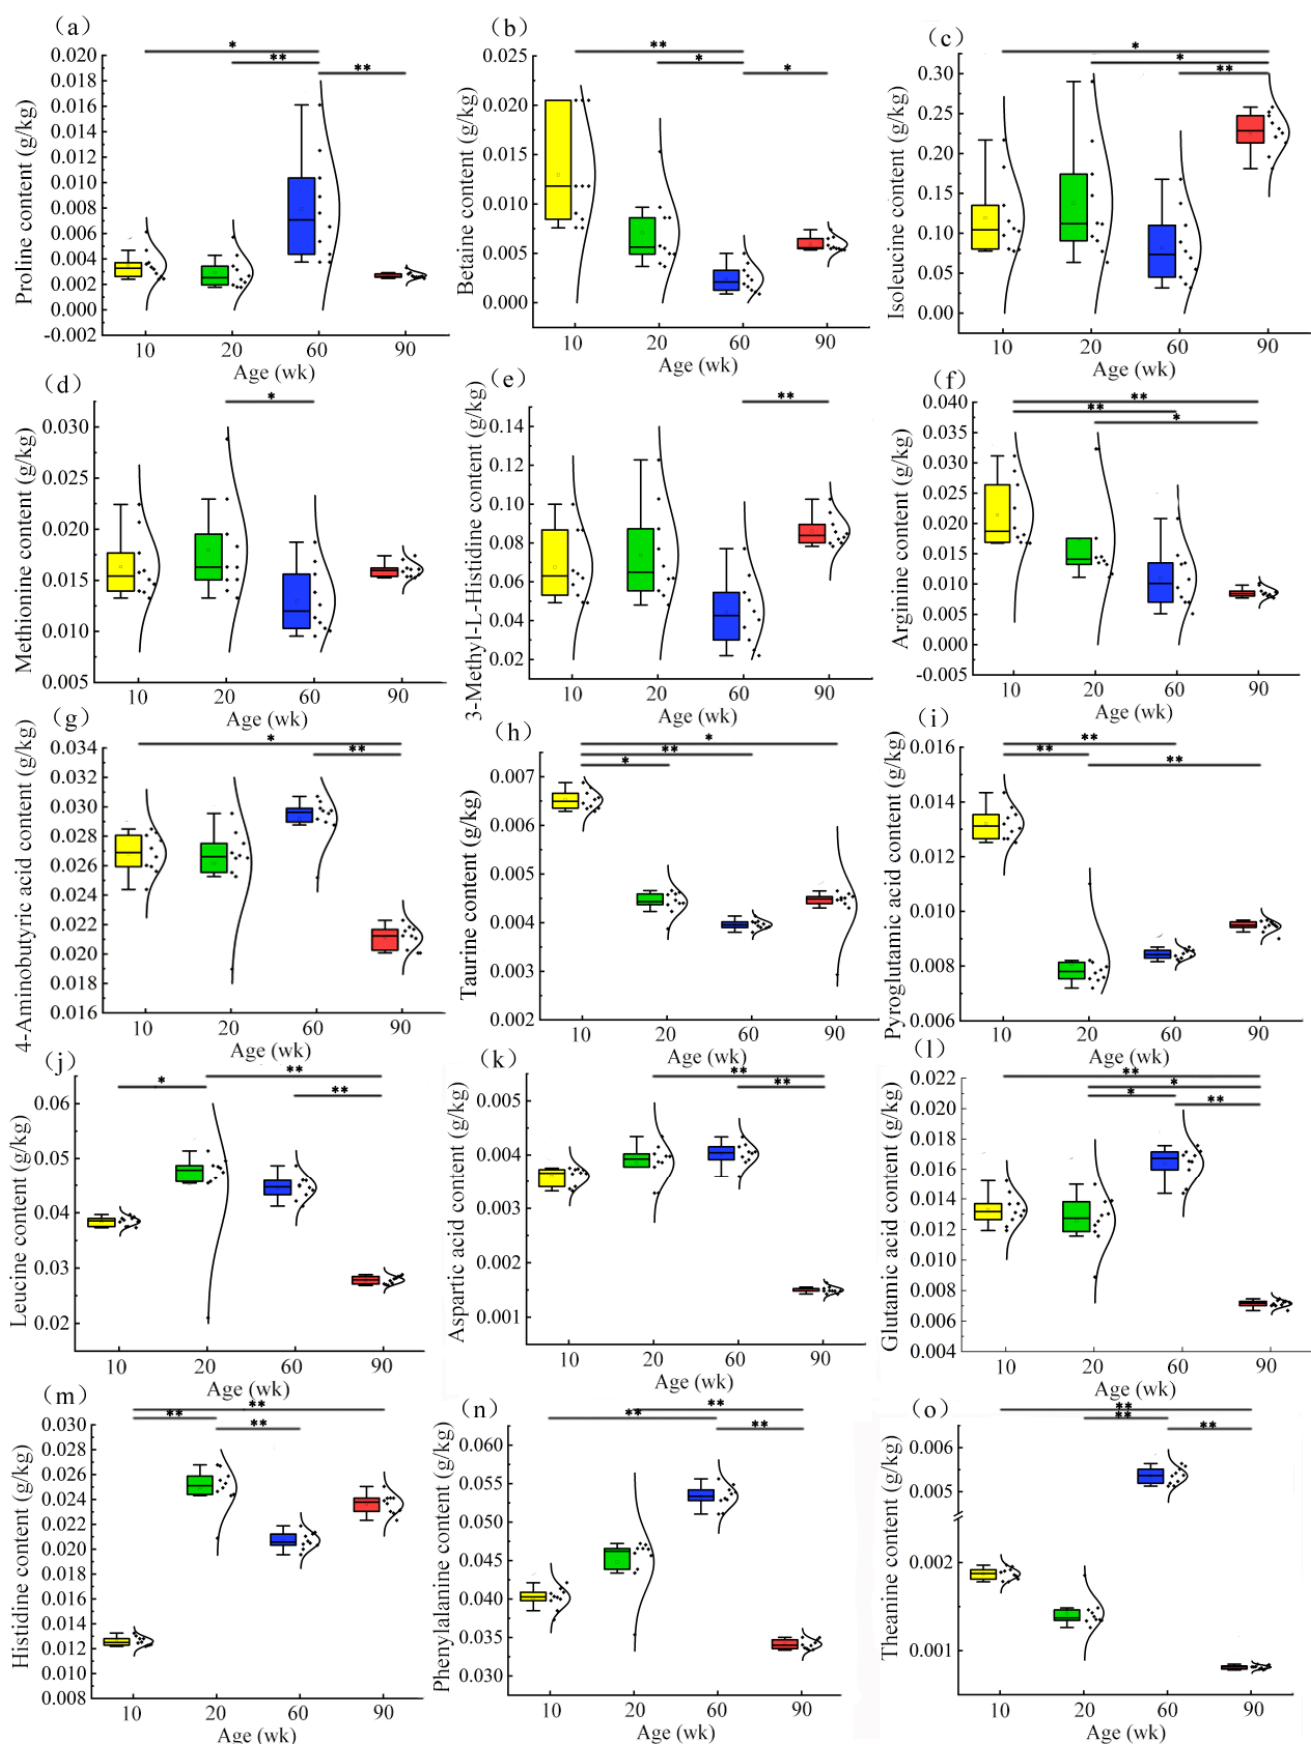

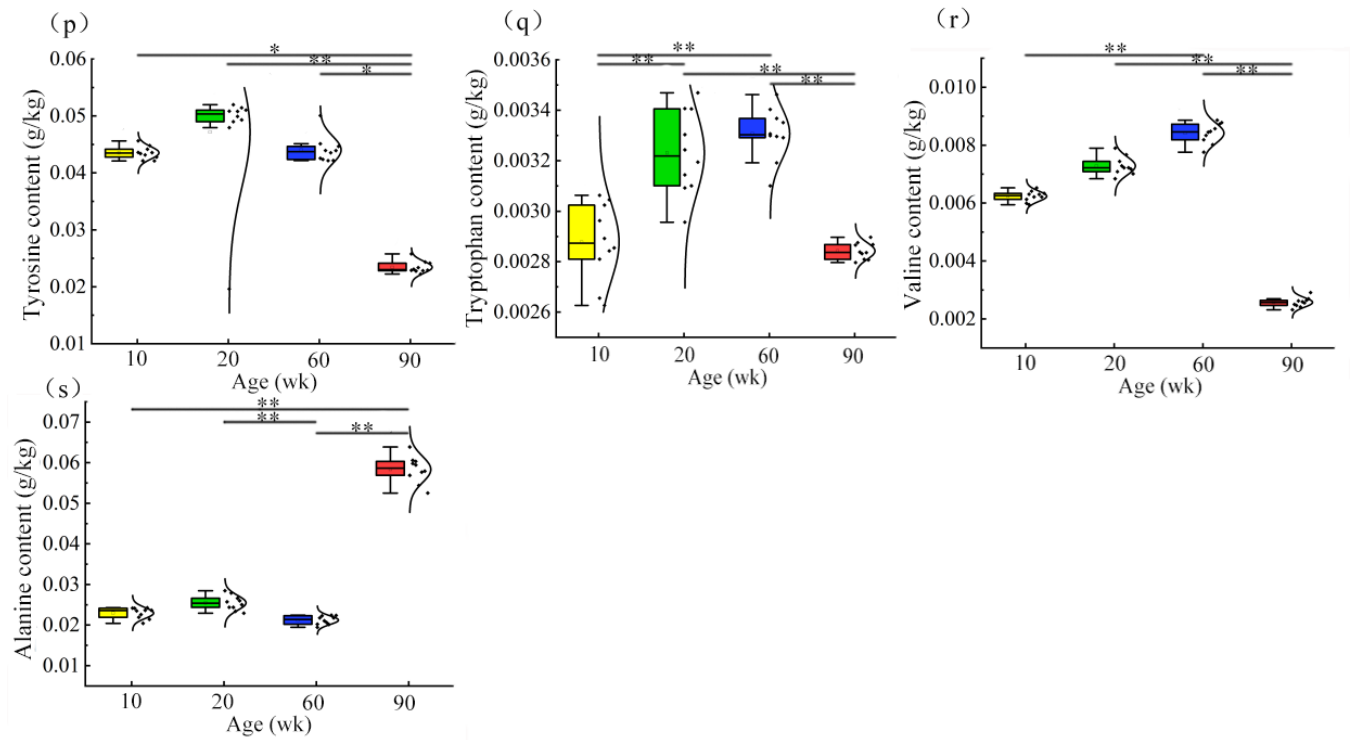

**Figure S2.** The distribution of amino acids and their derivatives (a-s) in four soup samples (\*\* $p < 0.01$ , \* $p < 0.05$ ).



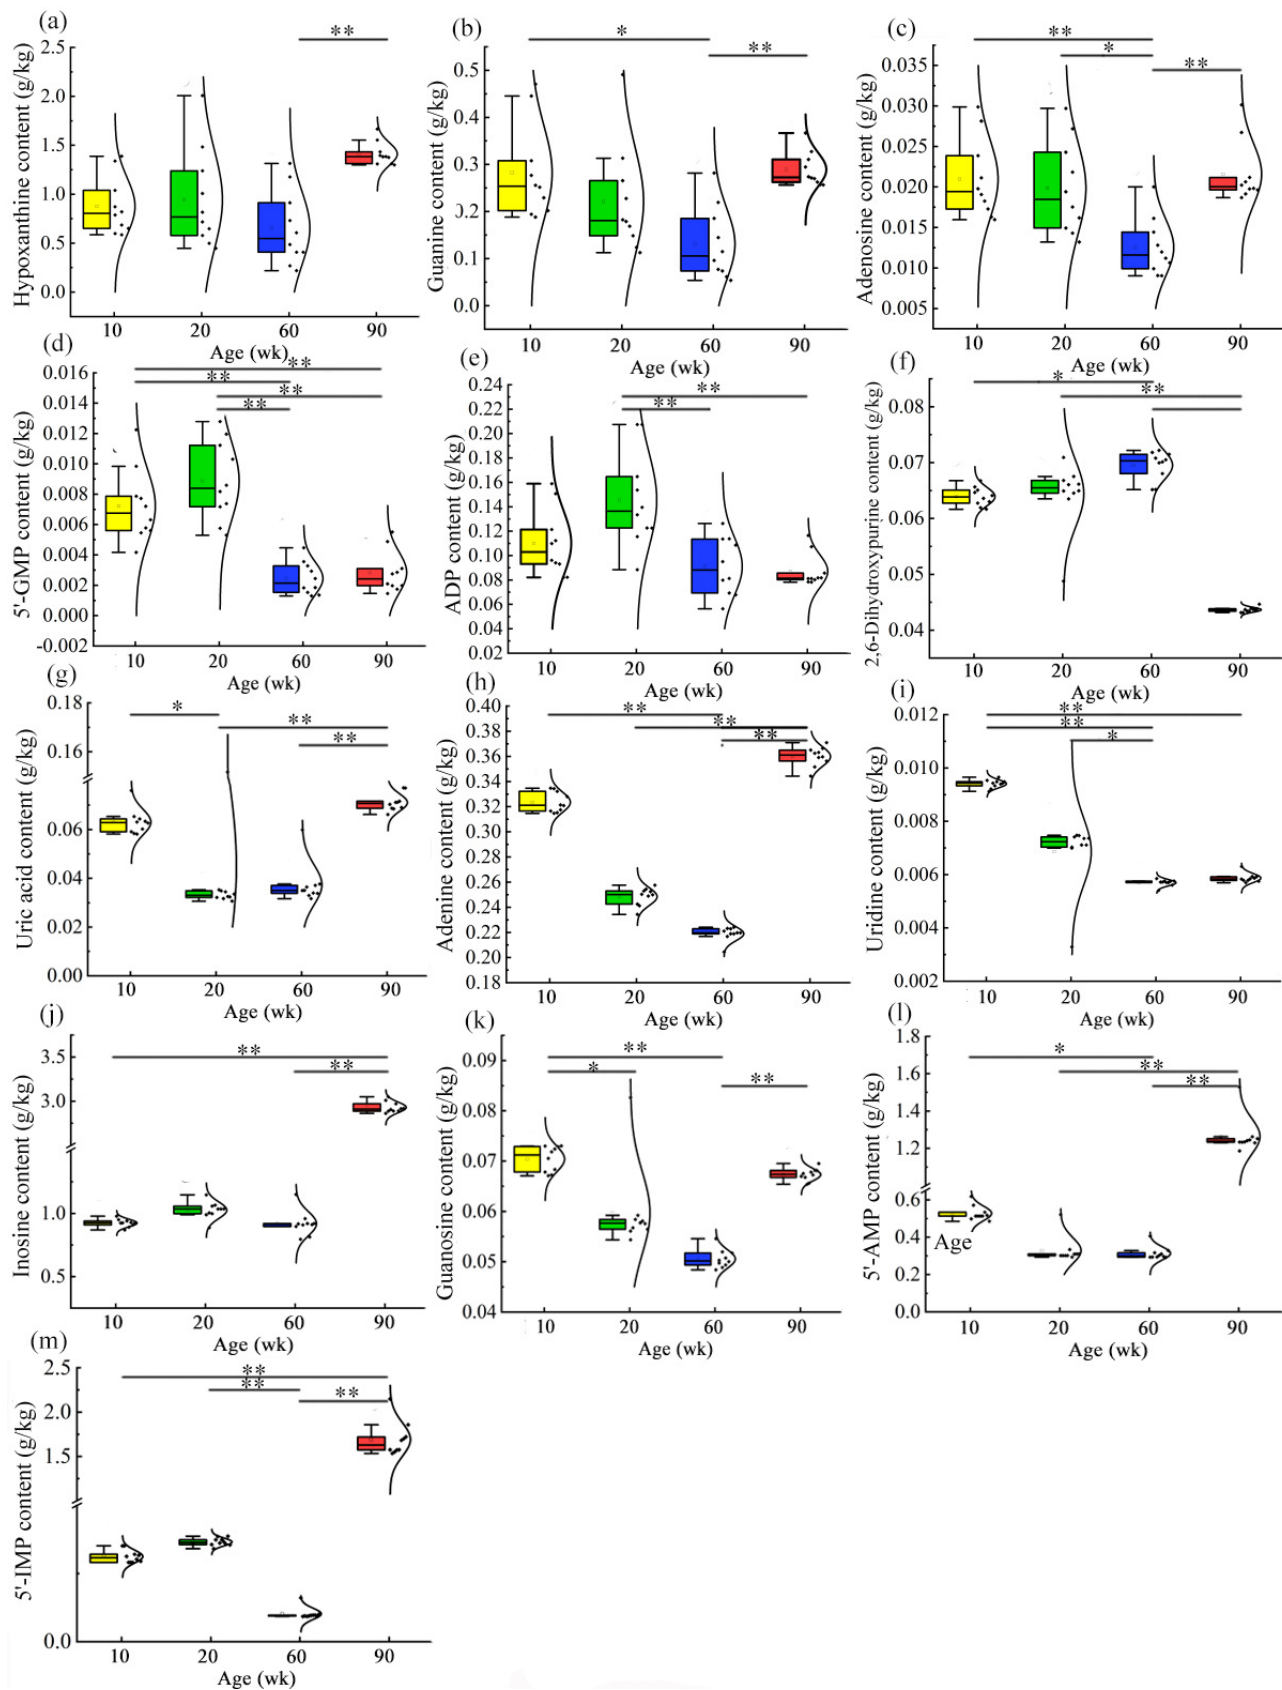

**Figure S3.** The distribution of nucleotides and their metabolites (a-m) in four soup samples (\*\* $p < 0.01$ , \* $p < 0.05$ ).

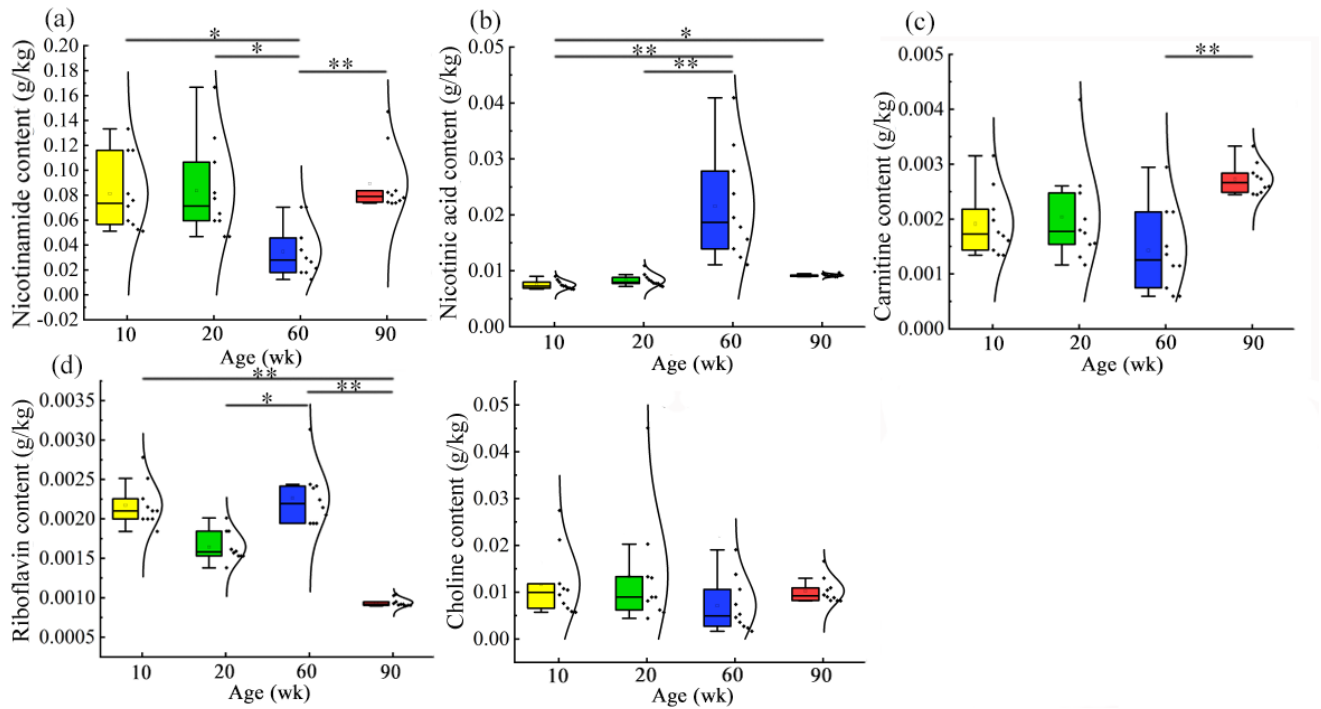

**Figure S4.** The distribution of vitamins (a-e) in four soup samples (\*\* $p < 0.01$ , \* $p < 0.05$ ).

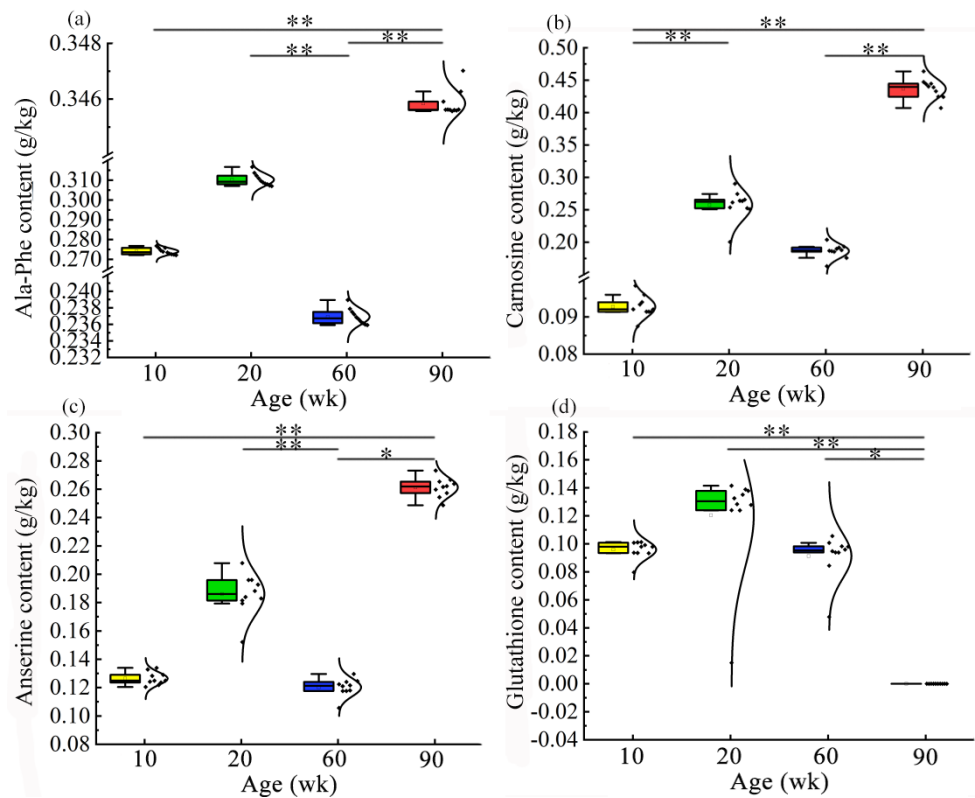

**Figure S5.** The distribution of peptides (a-d) in four soup samples (\*\* $p < 0.01$ , \* $p < 0.05$ ).

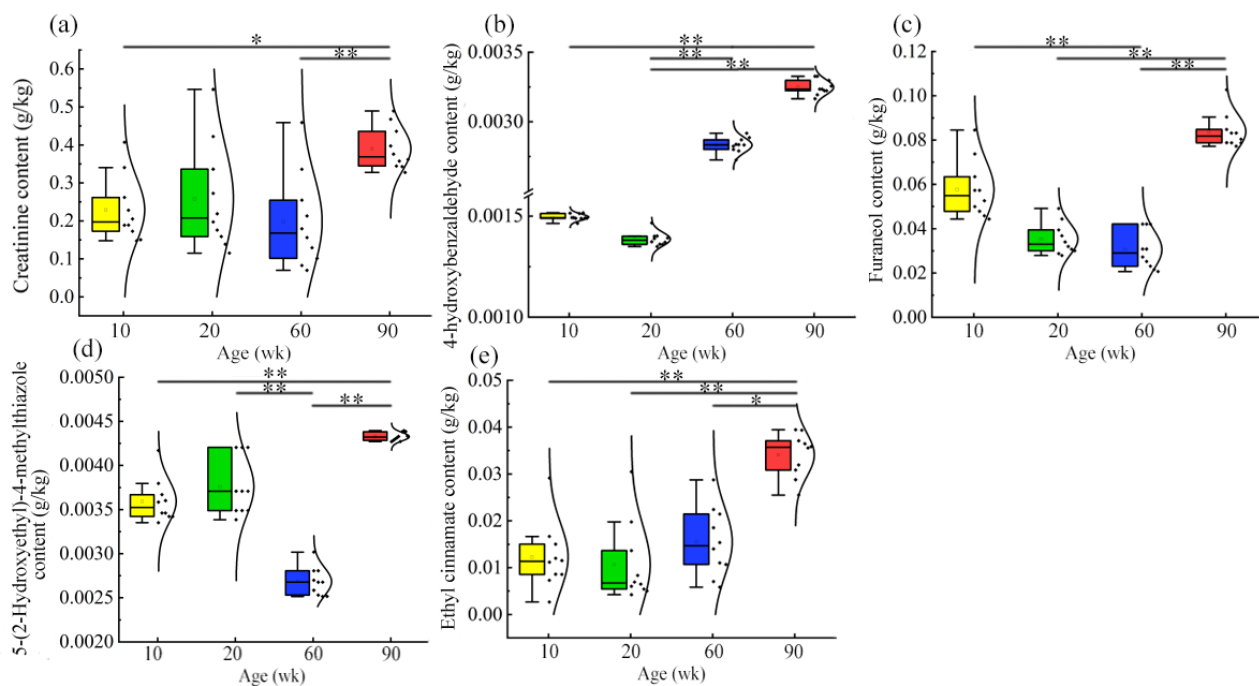

**Figure S6.** The distribution of other compounds (a-e) in four soup samples (\*\* $p < 0.01$ , \* $p < 0.05$ ).

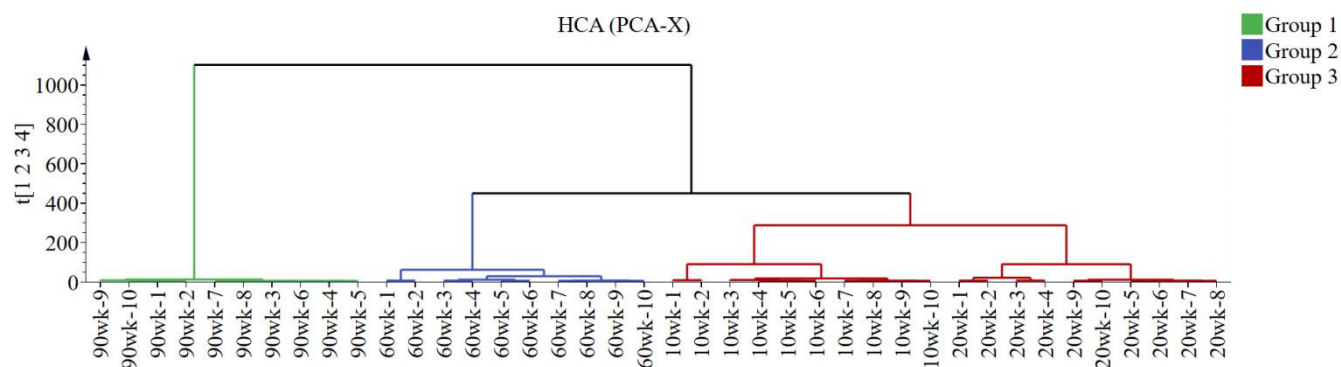

**Figure S7.** The hierarchical clustering analysis (HCA) of four soup samples (the greater distance between samples indicates greater variation).
